1 Cold survival and its molecular mechanisms in a locally adapted  
2 nematode population

3 Wenke Wang<sup>1,2</sup>, Anna G. Flury<sup>1,2</sup>, Jennifer L. Garrison<sup>1,3,4\*</sup>, and Rachel B. Brem<sup>1,2,3\*</sup>

4 <sup>1</sup>Buck Institute for Research on Aging, Novato, CA

5 <sup>2</sup>Department of Plant and Microbial Biology, UC Berkeley, Berkeley, CA

6 <sup>3</sup>Leonard Davis School of Gerontology, University of Southern California, Los Angeles, CA

7 <sup>4</sup>Department of Cellular and Molecular Pharmacology, UC San Francisco, San Francisco, CA

8  
9 \*To whom correspondence should be addressed: [jgarrison@buckinstitute.org](mailto:jgarrison@buckinstitute.org); [rbrem@berkeley.edu](mailto:rbrem@berkeley.edu)

10

## 11 **Abstract**

12 Since Darwin, evolutionary biologists have sought to understand the drivers and  
13 mechanisms of natural trait diversity. The field advances toward this goal with the  
14 discovery of phenotypes that vary in the wild, their relationship to ecology, and their  
15 underlying genes. Here, we established resistance to extreme low temperature in the  
16 free-living nematode *Caenorhabditis briggsae* as an ecological and evolutionary model  
17 system. We found that *C. briggsae* strains of temperate origin were strikingly more cold-  
18 resistant than those isolated from tropical localities. Transcriptional profiling revealed  
19 expression patterns unique to the resistant temperate ecotype, including dozens of  
20 genes expressed at high levels even after multiple days of cold-induced physiological  
21 slowdown. Mutational analysis validated a role in cold resistance for seven such genes.  
22 As the temperate *C. briggsae* population likely diverged only ~700 years ago from  
23 tropical ancestors, our findings highlight a candidate case of very rapid, robust, and  
24 genetically complex adaptation, and shed light on the mechanisms at play.

## 25 **Keywords**

26 *Caenorhabditis briggsae*, cold tolerance, temperate and tropical clusters, transcriptome,  
27 cold-evoked expression.

## 28 **Introduction**

29 Understanding how and why organisms differ in the wild is a key goal of evolutionary  
30 biology. Some traits are evolutionary accidents, and others arise under local adaptation,  
31 fixing in a population when they promote fitness in a new niche. Dissecting these

32 processes requires case studies where we can establish the underlying ecology, the  
33 phenotypes that have evolved, and, ultimately, the molecular mechanisms.  
34 Invertebrates can provide exceptional power toward this end (Adrion, Hahn, & Cooper,  
35 2015; Kraemer & Boynton, 2017; Sanford & Kelly, 2011; Savolainen, Lascoux, & Merilä,  
36 2013), but even in lower eukaryotes, genetically tractable ecological study systems  
37 remain at a premium in the field. Of particular interest are cases in which tools from the  
38 lab can be brought to bear to study evolution in natural settings.

39 *Caenorhabditis briggsae*, like its relative the model organism *C. elegans*, is a free-living  
40 nematode that has been isolated all over the world (Baird & Stonesifer, 2012; Cutter,  
41 Félix, Barrière, & Charlesworth, 2006; Okahata et al., 2016; Prasad, Croydon-Sugarman,  
42 Murray, & Cutter, 2011; Stegeman, De Mesquita, Ryu, & Cutter, 2013). Genetic and  
43 phenotypic analyses have revealed a split between strains of *C. briggsae* isolated from  
44 temperate and tropical localities (Cutter et al., 2006; Graustein, Caspar, Walters, &  
45 Palopoli, 2002). The contrast between these populations serves as a useful framework  
46 for the study of ecological diversification. Under current models, ancestral *C. briggsae*  
47 occupied the tropical niche, with colonization of and recent expansion into temperate  
48 latitudes ~700 years ago, possibly associated with human activity (Cutter et al., 2006).  
49 Elegant reports have characterized differences between temperate and tropical *C.*  
50 *briggsae* in temperature-dependent fecundity (Prasad et al., 2011) and behavior (Baird  
51 & Stonesifer, 2012; Cutter et al., 2006; Stegeman, Baird, Ryu, & Cutter, 2019;  
52 Stegeman et al., 2013), with a focus on chronic response to warm and hot conditions  
53 (14°C to 30°C). Resistance to acute temperature shock, as it has evolved among *C.*  
54 *briggsae* populations, remains less well understood. The response to extreme low

55 temperature is a compelling potential character under ecological pressures in the *C.*  
56 *briggsae* system, as it is likely to manifest in the winter season of temperate latitudes  
57 and not in tropical regions (Lacher & Goldstein, 1997).

58 In this study, we investigated the response to cold stress across *C. briggsae* strains  
59 isolated from different niches. We found that temperate strains survived cold conditions  
60 in which most animals of tropical origin died. Using two strains, AF16 and HK104, as  
61 representative of the tropical and temperate populations respectively, we profiled cold-  
62 responsive transcriptomes to achieve molecular insight into the divergence in the cold  
63 resistance trait. Against a backdrop of thousands of genes with cold-evoked expression  
64 patterns shared between the strains, we found >100 genes with high expression unique  
65 to cold-treated HK104. In mutational tests, we confirmed the role of seven of the latter  
66 genes in cold resistance.

## 67 **Materials and methods**

### 68 **Worm strains**

69 Wild-type strains of *C. briggsae* (AF16, VT847, ED3083, JU726, QX1410, HK104,  
70 PB826, JU439, EG4181 and VX34) and *C. elegans* (CB4555, N2, AB1, JU262, PX179,  
71 JU258, JU1172, JU1652, JU393, MY16, JU779, JU1088, GXW1, ED3077 and ED3052)  
72 are described in Table 1 and Supplementary Table 2 respectively. To generate and  
73 transcriptionally profile AF16 x HK104 F1 hybrids, we first made a marked strain of  
74 AF16, CP161 (*Cbr-unc-119(nm67) III; nmls7 [Cni-mss-1(+)+ Cni-mss-2(+)+ Cbr-myo-*  
75 *2::GFP + unc-119(+)]*). We then crossed HK104 hermaphrodites with CP161 males,

76 picked labeled hermaphrodite F1 progeny at the L4 stage, and used them as input into  
77 cold treatment and expression profiling procedures as detailed below.

78

79 *C. elegans* mutant strains profiled in Figure 5 are as follows: JT366 *vhp-1(sa366) II*,  
80 IG685 *tir-1(tm3036) III*, KU4 *sek-1(km4) X*, NL152 *pdp-1(pk17) IV*; *pdp-3(pk18) X*; *mrp-*  
81 *1(pk89) X*, RB1916 *pdp-8(ok2489) X*, RB1840 *M28.8(ok2380) II*, VC2677  
82 *Y47G6A.5(gk1098) I*, GH403 *glo-3(kx94) X*, VC422 *tag-120(gk221) V*, VC1392 *zip-*  
83 *5(gk646) V*, RB792 *F09C12.2(ok582) II*, RB1284 *C30F12.6(ok1381) I*, VC2072 *grh-*  
84 *1(gk960) I*, RB2200 *gst-24(ok2980) II*, VC1499 *nhr-117(gk707) V*, JT5244 *aex-4(sa22)*  
85 *X*, RB1267 *D1009.3(ok1349) X*, RB2171 *Y4C6A.1(ok2938) IV*, VC2214 *nhr-*  
86 *178(gk1005) V*, RB1749 *numr-1(ok2239) III*, RB2499 *T27F2.4(ok3462) V*, RB1067 *his-*  
87 *24(ok1024) X*, VC1544 *C12D12.5(gk700) X*, IG544 *nipi-3(fr4) X*, RB1362  
88 *H22K11.4(ok1529) X*, BC15170 *dpy-5(e907) I*, COP677 *ncr-1(knu4) X*, *swt-6(tm5930)*  
89 *V*, *K03H1.5(tm10908) III*, *lips-10(tm7601) II*, *F26A10.2(tm549) X*, *F45E10.2(tm5965) II*,  
90 *arrd-25(tm12435) V*, *C18H9.5;C18H9.1(tm12783) II*, *bigr-1(tm6317) II*, *smoc-1(tm7000)*  
91 *V*, *npr-13(tm1504) V*, *sek-3(tm1344) X*, *cnp-3(tm2950) X*, *fpn-1.1; npp-13(tm6914) I*,  
92 *osta-3(tm5747) II*, *C18H7.11(tm12727) IV*, *F21G4.1; mrp-4(tm10068) X*.

### 93 **Cold tolerance assays**

94 Cold tolerance assays were performed as described (Jiang et al., 2018). For a given  
95 biological replicate of a given strain or treatment condition, 20-30 worms were dispersed  
96 on each of 2-3 plates and raised at 20°C until 24 hours after they reached the L4 stage.  
97 Plates were then distributed with equal distance between them in a box and transferred  
98 to a constant 4°C cold room for the duration indicated below and in figure captions.

99 Plates were then moved to room temperature for 2 hours before survival scoring, in  
100 which worms that failed to respond to a gentle prodding with a platinum wire were  
101 scored as dead. For each strain at least three independent experiments were  
102 performed.

### 103 **RNA isolation and library preparation for RNA-seq**

104 RNA isolation was performed essentially as described (Wang et al., 2018). For a given  
105 biological replicate of a given strain, 100-200 synchronized mid/late L4 stage worms  
106 were picked and incubated at 20°C for 24 hours, after which one cohort of worms was  
107 harvested immediately, representing the untreated control, and another cohort was  
108 subjected to 4°C treatment for 60 hours as above, followed by harvest. Two replicates  
109 for each strain and each condition were performed. Collected worms were homogenized  
110 in 1 ml Tri-reagent (ThermoFisher) for 30 min at room temperature. 0.1 mL of  
111 bromochloropropane (BCP, Sigma) was added to the sample and mixed well. The  
112 sample was then spun at 12,000g for 15 min at 4°C and the aqueous phase was  
113 transferred to a new tube. 0.5 mL Isopropanol was added to the sample, followed by  
114 incubation at room temperature for 10 min and centrifugation at 12,000g for 10 min. The  
115 RNA pellet was washed twice with 75% EtOH and dissolved in water. The RNA sample  
116 was then purified to remove DNA using the RNeasy Mini Kit (Qiagen), and used as  
117 input into RNA-seq library preparation using KAPA RNA hyper prep kit (Roche).

### 118 **Amended reference genome construction**

119 We established a reference genome for *C. briggsae* strain HK104 as follows. Raw  
120 genome sequencing reads for HK104 were downloaded from the NCBI (project

121 accession PRJNA509247). These reads were aligned to genome assembly CB4 of the  
122 reference sequence of the *C. briggsae* AF16 strain (Genbank Assembly Accession  
123 GCA\_000004555.3) using bowtie2 with default parameters. Samtools, bcftools, and  
124 bgzip were used to call SNPs, retaining those with a quality score of >20 and combined  
125 depth of >5 and <71. We then generated a pseudogenome by replacing the reference  
126 AF16 allele with that of HK104 at each SNP using bcftools, totaling 441,227 SNPs. This  
127 new amended HK104 genome was then concatenated to the reference AF16 genome  
128 to form a master AF16-HK104 genome.

### 129 **RNA-seq data analysis**

130 RNA-seq data analysis was essentially as described (Wang et al., 2018). For each  
131 library, ~20M 150bp length paired-end reads were generated. Low quality reads were  
132 removed using the FASTX Toolkit. Illumina primer sequences (adaptors) were removed  
133 from read sequences using cutadapt.

134 For transcriptomes of purebred AF16 and HK104, the resulting trimmed reads were  
135 aligned to the respective reference genome using the HISAT2 2.2.0 alignment program  
136 with default parameters. Mapped reads were then input into HTSeq 0.11.1 to calculate  
137 normalized counts for each gene. Genes with fewer than 20 reads mapped to them in  
138 all samples were removed and the remaining genes were used as input to test for  
139 differential expression using the generalized linear model framework in edgeR (in the  
140 module glmQLFTest) as follows. For Figure 3, each strain's transcriptomes were used  
141 as input to a test for genes whose expression changed between cold and untreated  
142 samples. For Figure 4, the complete set of transcriptomes from both strains and both

143 conditions was used as input to a test for genes at which the impact of cold on  
144 expression was different between the strains.

145 For transcriptomes of the AF16 x HK104 F1 hybrid, trimmed reads were aligned to a  
146 concatenation of the two strains' reference genomes, and only reads that mapped to a  
147 single location in this concatenated reference were retained for analysis, reflecting  
148 allele-specific expression at the respective strain's allele of the respective gene.

149 Normalized read counts and significance testing were as for Figure 4 above, reporting  
150 cases of temperature effects that differed between the two strains' alleles.

151 All raw transcriptome data are available at GEO: GSE171725 and SRA: SRP314054.

152 Principal component analysis was performed using the built-in function in edgeR. Gene  
153 Ontology term enrichment analysis was performed using the web tool at  
154 geneontology.org.

155 Genes for the mutant screen of Figure 5 in *C. elegans* were chosen as those that  
156 exhibited higher expression under cold treatment than in control condition in HK104  
157 when analyzed separately, at nominal  $p < 0.01$ ; exhibited stronger cold-evoked  
158 expression change in HK104 than in AF16 in the strain-by-temperature analysis, at  
159 nominal  $p < 0.01$ ; and were annotated with one-to-one orthology between *C. elegans*  
160 and *C. briggsae*.

### 161 **CRISPR-mediated genome editing**

162 CRISPR-mediated genome editing for *C. briggsae* was performed using an established  
163 protocol (Culp et al., 2020) modified from the analogous protocol for *C. elegans*  
164 (Friedland et al., 2013). For generating mutations in WBGene00025434,



165 WBGene00037162, WBGene00025987, WBGene00034955, and WBGene00031437,  
166 the *C. briggsae* orthologs of *vhe-1*, *pgp-8*, *M28.8*, *ncr-1* and *K03H1.5* genes  
167 respectively, day 1 adult animals of AF16 and HK104 were injected with pDD162 (*Peft-*  
168 *3::Cas9::tbb-2 3'UTR*), pCFJ90 (*Pmyo-2::mCherry*) and 2-4 different pU6::sgRNAs for  
169 the gene of interest. Surviving worms were separated, and F1 mCherry-positive animals  
170 were collected; their progeny, representing the F2 generation, were genotyped for the  
171 respective gene. Mutant genotypes are reported in Supplementary Table 3.

## 172 **Results**

### 173 **Wild *C. briggsae* isolated from temperate but not tropical regions survive** 174 **hypothermia independent of rearing temperature**

175 Since temperature is one of the major factors that distinguish temperate and tropical  
176 climates (Lacher & Goldstein, 1997; Prasad et al., 2011), we hypothesized that *C.*  
177 *briggsae* strains from these two niches would respond to hypothermia differently. To test  
178 this, we cultivated *C. briggsae* strains from the tropical cluster (AF16, VT847, ED3083,  
179 JU726 and QX1410) and strains from the temperate cluster (HK104, PB826, JU439,  
180 EG4181 and VX34) (Table 1) at 20°C until they reached adulthood, and then switched  
181 the animals to 4°C. All worms were immobile after 60 hours of cold treatment, but upon  
182 recovery, strains from the temperate cluster survived at ~100%, whereas strains from  
183 the tropical cluster died at high rates (Figure 1).

184 Cultivation temperature during development can affect the cold tolerance of adult worms  
185 (Ohta, Ujisawa, Sonoda, & Kuhara, 2014; Okahata et al., 2016). To examine this effect  
186 in the *C. briggsae* system, we used AF16, isolated from tropical India, and HK104, from

187 a temperate niche in Japan, as representatives of the respective clades. As expected  
188 (Ohta et al., 2014), cold tolerance decreased in both AF16 and HK104 animals that had  
189 gone through development at higher temperatures (Figure 2) and in worms treated with  
190 longer cold shock (Supplementary Figure 1). However, at all rearing temperatures,  
191 HK104 was far more likely to survive cold treatment than was AF16 (Figure 2). Together,  
192 these results reveal protection from lethal cold shock as a trait specific to temperate-  
193 clade *C. briggsae*, in a manner that is largely independent of rearing temperature.

#### 194 **Transcriptional responses to cold stress unique to and shared between *C.*** 195 ***briggsae* strains**

196 To gain molecular insight into differences in cold stress response between tropical- and  
197 temperate-clade *C. briggsae*, we took a transcriptional approach, again making use of  
198 the AF16 and HK104 isolates as a model comparison. Transcriptome profiles of these  
199 strains before and after cold treatment revealed robust clustering by temperature and  
200 strain background, and tight agreement between replicates (Figure 3a and  
201 Supplementary Table 1).

202 We first analyzed AF16 and HK104 separately with respect to cold-evoked changes in  
203 gene expression, and inspected commonalities between the strains. In these data, a  
204 pattern of declining RNA levels predominated in both AF16 and HK104, with 2584  
205 genes expressed at lower levels upon cold treatment in both strains (at a false  
206 discovery rate of 0.15; Figure 3b). Functional-genomic analyses of the latter revealed  
207 enrichment for a variety of gene groups involved in growth and cellular metabolism  
208 (Figure 3d), as expected if cold-treated animals of both strains slow or arrest many  
209 biological processes (Jiang et al., 2018; Robinson & Powell, 2016). By contrast,

210 relatively few genes in each strain were expressed at higher levels in the cold relative to  
211 an untreated control (Figure 3b). Only 195 genes exhibited high RNA levels in cold  
212 conditions in both AF16 and HK104, with enrichment for functions in RNA processing  
213 and metal ion stress (Figure 3c). More salient from these data was the apparent bias for  
214 a program unique to temperate HK104, in which we detected an excess of cold-evoked  
215 genes that were not called in the analogous tests on AF16 transcriptomes (Figure 3b).

216 We thus turned our attention to a more rigorous search for strain-by-temperature  
217 expression effects (see Methods). The results revealed 191 genes for which the  
218 expression response to cold shock was distinct between AF16 and HK104 (at a false  
219 discovery rate of 0.15; Supplementary Table 1). These cases of expression divergence  
220 were largely specific to cold treatment, with few striking difference between the strains  
221 at 20°C. Most (164 genes) followed a pattern of high cold-evoked expression in the  
222 temperate strain, HK104, and dropped in expression in the cold in AF16 (Figure 4 and  
223 Supplementary Figure 2).

224 We thus formulated a model in which HK104 expressed a unique program of cold-  
225 protective factors, whose components could underlie cold resistance at the organismal  
226 level. We then earmarked this program for mechanistic follow-up. In transcriptional  
227 profiles of AF16 x HK104 hybrid animals, we saw little evidence for *cis*-regulatory  
228 divergence at these focal genes (Supplementary Table 1), implicating *trans*-acting  
229 variants as the underlying cause of the expression patterns of interest.

230 **Natural variation and genetics of cold tolerance in *C. elegans***

231 We set out to use gene ablation to test the phenotypic role of our candidate genes,  
232 those expressed at high levels in HK104 during survival of hypothermia. We reasoned  
233 that an expedient screen for this purpose could start with *C. elegans*. The latter is much  
234 better characterized than *C. briggsae* (Hillier et al., 2007), and genetic mutants are  
235 widely available, as opposed to the few mutants generated to date in *C. briggsae* (Hillier  
236 et al., 2007); many developmental, behavioral, and physiological phenotypes are  
237 conserved between the species (Culp et al., 2020; Hillier et al., 2007; Yin et al., 2018).

238 To explore the utility of *C. elegans* as a model for cold resistance, we first assayed cold  
239 tolerance in 14 wild *C. elegans* strains from temperate locales, and one from a tropical  
240 region (Supplementary Table 2). We used a regimen of rearing at 20°C and cold shock  
241 at 4°C for 60 hours, in which the *C. elegans* laboratory strain N2 exhibits robust  
242 resistance (Ohta et al., 2014). Our results revealed complete lethality in response to  
243 cold shock in most other *C. elegans* isolates (Figure 5). Beside N2, originally isolated  
244 from England, and CB4555, an N2 descendant (Sterken, Snoek, Kammenga, &  
245 Andersen, 2015), only AB1, an Australian isolate previously shown to acclimate rapidly  
246 to cold (Okahata et al., 2016), exhibited cold resistance on par with that of temperate-  
247 clade *C. briggsae* (Figure 5). We conclude that, in contrast to our observations in *C.*  
248 *briggsae*, temperate collection locality does not associate with cold tolerance in *C.*  
249 *elegans*, strongly suggesting a difference in pressures on the trait between the species.  
250 However, we viewed the cold resistance of laboratory *C. elegans* as a useful model for  
251 that of temperate *C. briggsae*, with the potential for insights from a genetic screening  
252 pipeline.

253 To this end, we carried out a mutant screen in *C. elegans* of cold-induced genes in  
254 HK104. To cast the widest possible net for genes of interest, we selected them from our  
255 expression data with more lenient cutoffs than we had used for initial genomic analyses  
256 (see Methods), amounting to 43 total genes for the screen. For each, we acquired a  
257 transgenic strain of the N2 background harboring a mutation in the respective gene, in  
258 some cases in a background also including other lesions. Assays for cold resistance  
259 revealed seven genes as necessary for the trait in *C. elegans* N2 (Figure 6): *vhp-1*  
260 (encoding a MAPK phosphatase), *pgp-8* (an ABC transporter), *ncr-1* (involved in  
261 cholesterol trafficking), *gst-24* (glutathione-S-transferase), *numr-1* (a hypothesized  
262 splicing factor), and the uncharacterized genes *M28.8* and *K03H1.5*. By virtue of their  
263 role in cold tolerance in *C. elegans*, and their unique cold-evoked induction profile in *C.*  
264 *briggsae* HK104, this set of genes represented our top candidates for determinants of  
265 cold resistance in the latter.

### 266 **Genetic determinants of cold resistance in temperate *C. briggsae***

267 To explore the phenotypic role of our candidate genes in *C. briggsae*, we made use of a  
268 CRISPR-Cas9 system for targeted mutations, for which we chose to focus on five genes  
269 with the largest effect size in our *C. elegans* cold resistance screen (*vhp-1*, *pgp-8*,  
270 *M28.8*, *ncr-1* and *K03H1.5*). Of these, we were unable to develop homozygous mutants  
271 for *ncr-1* in the HK104 temperate *C. briggsae* strain, suggesting an essential function for  
272 this gene. For each of the remaining genes in turn (*vhp-1*, *pgp-8*, *M28.8*, and *K03H1.5*),  
273 we established an HK104 line and, separately, a line of tropical *C. briggsae* AF16  
274 harboring a premature stop codon in the coding region (Supplementary Table 3). We  
275 then investigated the cold survival phenotype of each such mutant strain. For this

276 purpose, given the extreme cold resistance of HK104 (Figures 1 and 2), we subjected  
277 mutants in this background to five days of cold treatment alongside a wild-type control;  
278 results revealed a robust and significant increase in cold shock lethality in *pgp-8*, *M28.8*,  
279 and *K03H1.5* mutants, confirming the importance of these genes in the HK104  
280 phenotype (Figure 7a). In the AF16 background, which is radically cold-sensitive  
281 (Figures 1 and 2), we were required to use a shorter-duration cold-shock assay design;  
282 here we observed no effect of *vhp-1*, *pgp-8*, *M28.8*, or *K03H1.5* mutation at any  
283 timepoint (Figure 7b). These data establish that several of our top genes contribute  
284 uniquely to the cold resistance phenotype in HK104, validating our inference from this  
285 strain's expression profiles (Figure 4) as a resource for mechanistic insights in this  
286 system.

## 287 **Discussion**

288 Understanding diversity in the natural world requires the discovery of traits that have  
289 changed in response to ecological factors, and the use of molecular tools to understand  
290 their mechanisms. Heat and cold response are particularly ripe for evolutionary study in  
291 ectotherms, whose body temperature depends on that of their environment (Flouris &  
292 Piantoni, 2015). In this work, we have established resistance to cold shock as a  
293 character distinguishing the temperate clade of the nematode *C. briggsae* from cold-  
294 sensitive tropical isolates. Our findings dovetail with the known fecundity disadvantage  
295 of temperate *C. briggsae* at high temperature relative to tropical strains (Prasad et al.,  
296 2011), as well as behavioral (Cutter et al., 2006; Stegeman et al., 2019, 2013) and  
297 transcriptional (Mark et al., 2019) differences between the clades under hot conditions.

298 Our focus on cold was motivated by the cooler extreme winter temperatures in the  
299 collection localities of temperate *C. briggsae* (Adrion et al., 2015; Stegeman et al., 2013)  
300 By contrast, the average summer temperature is comparable in most such collection  
301 sites, regardless of whether the region is temperate or tropical (Prasad et al., 2011).  
302 Given these climatic factors, and the striking phenotype we report here, it is tempting to  
303 speculate that selection for cold survival in the winter months has been a key driver of  
304 local adaptation in *C. briggsae* as in other nematodes (McGaughran & Sommer, 2014).  
305 Any such evolutionary events would have happened remarkably quickly, in light of the  
306 700-year divergence time estimated for the temperate and tropical clades (Cutter et al.,  
307 2006).

308 Evolutionary pressures on the trait in *C. elegans* remain less clear, since we and others  
309 (Okahata et al., 2016) have found strains of this species from temperate localities to run  
310 the gamut from cold-resistant to cold-sensitive. This may be the product of migration  
311 and admixture in the worldwide *C. elegans* population (Petersen, Dirksen, &  
312 Schulenburg, 2015), preventing local adaptation in hot or cold environments, or in any  
313 one niche (although important exceptions have been reported (Crombie et al., 2019)).  
314 As *C. elegans* and *C. briggsae* diverged ~100 million years ago (Hillier et al., 2007),  
315 cold tolerance in the two species likely arose independently. The vast divergence in  
316 their genomes (Stein et al., 2003) would represent differences in the chassis on which  
317 the trait was built, reflected in the fact that some genes we tested affected cold shock  
318 survival in resistant *C. elegans* but not *C. briggsae*.

319 Our evolutionary analysis of wild worms complements an extensive literature on the  
320 basic biology of hypothermia response in laboratory *C. elegans*. An important thread of

321 this prior work has highlighted the dieoff of animals re-introduced into warm  
322 temperatures after cold shock, and its physiological and transcriptomic correlates (Jiang  
323 et al., 2018; Robinson & Powell, 2016). For our expression profiling, instead of the re-  
324 warming recovery phase, we focused on the end of the cold exposure regimen, and the  
325 genes with high RNA levels at this timepoint. Our validation of a causal role in cold  
326 tolerance for seven such genes (in *C. elegans*, temperate *C. briggsae*, or both)  
327 suggests that cold resistance hinges in part on physiology during the treatment itself.  
328 Under one compelling model, protective factors expressed during cold stress could  
329 mitigate tissue damage before recovery even starts. Additionally, proteins expressed in  
330 the cold could set up a poised state for rapid signaling and repair during recovery.  
331 Ultimately, as a complete picture of the biology of cold resistance becomes clear, it will  
332 likely integrate mechanisms operating in the two phases; and the failures in tropical *C.*  
333 *briggsae* could prove to manifest in either one. The transcription factor gene *ZIP-10*,  
334 known to promote death during recovery after cold treatment (Jiang et al., 2018), was  
335 expressed less in tropical AF16 than in temperate HK104 in our profiles (Supplementary  
336 Table 1), suggesting that the trait divergence between the strains hinges on a  
337 mechanism distinct from the *ZIP-10* pathway.

338 That said, among the many other known molecular mechanisms of cold resistance in *C.*  
339 *elegans* (Jiang et al., 2018; Ma et al., 2015; Murray, Hayward, Govan, Gracey, &  
340 Cossins, 2007; Okahata, Wei, Ohta, & Kuhara, 2019; Robinson & Powell, 2016; Sonoda,  
341 Ohta, Maruo, Ujisawa, & Kuhara, 2016; Takagaki et al., 2020; Ujisawa et al., 2018),  
342 some are echoed in the genes we have validated in the trait. For instance, regulating  
343 membrane lipid composition and fluidity is well-characterized as a strategy for cold



344 tolerance in the worm (Ma et al., 2015; Murray et al., 2007); the cholesterol processing  
345 gene *ncr-1*, which we found to be required for cold tolerance in *C. elegans*, is likely to  
346 act through this mechanism. Likewise, detailed studies have established the role of  
347 sensory neurons in cold resistance (Ohta et al., 2014; Okahata et al., 2019; Sonoda et  
348 al., 2016; Takagaki et al., 2020; Ujisawa et al., 2018). This system could well involve  
349 *M28.8*, which we identified as required for the trait in *C. elegans* and temperate *C.*  
350 *briggsae*, is expressed in dopaminergic neurons, and is the ortholog of a *Drosophila*  
351 photoreceptor gene (Nie et al., 2012).

352 Furthermore, in our larger set of cold-evoked expression changes, several emergent  
353 patterns parallel those seen in the broader literature. In previous analysis of *C. elegans*,  
354 recovery after cold shock was associated with changes in lipid and amino acid  
355 metabolism, groups from which many genes exhibited low expression during cold shock  
356 itself in our *C. briggsae* study (Jiang et al., 2018). Likewise, RNA binding and  
357 stabilization factors are activated by cold in mammalian cells (Sonna, Fujita, Gaffin, &  
358 Lilly, 2002) and in yeast and bacteria (Aguilera, Randez-Gil, & Prieto, 2007; Keto-  
359 Timonen et al., 2016), just as we have seen in *C. briggsae*. Metal ion stress response,  
360 another cold-induced gene set in mammalian cells (Sonna et al., 2002), also featured  
361 among upregulated genes in our *C. briggsae* data. Additional stress response genes  
362 are induced in cold-shock studies of other organisms, including heat shock factors  
363 (Aguilera et al., 2007; Keto-Timonen et al., 2016; Rinehart et al., 2007; Shore et al.,  
364 2013; Sonna et al., 2002), whose relevance in the worm remains to be elucidated.

365 In summary, we have established cold resistance in *C. briggsae* as a rapidly evolved,  
366 and likely adaptive, product of ecological diversification, and we have traced the

367 attendant expression changes in genes required for cold tolerance. These findings  
368 underscore the power of ecological-genetic studies in wild strains of a tractable model  
369 organism, which hold promise for continued progress in the discovery of how nature  
370 builds new traits.

## 371 **Acknowledgements**

372 This work was supported by NIH GM120430-A1 to RBB and JLG, NIH R35GM119828  
373 to JLG, and NIH 1S10OD021686 to JLG for the COPAS large particle sorter housed in  
374 the Buck Institute Morphology and Imaging Core; the American Federation for Aging  
375 Research; and the Glenn Foundation for Medical Research. QX1410 and VX34 were  
376 kind gifts from Dr. Erik Andersen (Northwestern University). All other strains were  
377 provided by the Caenorhabditis Genome Center, which is funded by the NIH Office of  
378 Research Infrastructure Programs (P40 OD010440), and the National BioResource  
379 Project of Japan, supported by the Japanese Ministry of Education, Culture, Science,  
380 Sports and Technology. We thank members of the Brem laboratory (UC Berkeley) and  
381 Garrison laboratory (Buck Institute for Research on Aging) for insightful discussions.

## 382 References

- 383 Adrion, J. R., Hahn, M. W., & Cooper, B. S. (2015). Revisiting classic clines in  
384 *Drosophila melanogaster* in the age of genomics. *Trends in Genetics : TIG*, *31*(8),  
385 434–444. doi: 10.1016/j.tig.2015.05.006
- 386 Aguilera, J., Randez-Gil, F., & Prieto, J. A. (2007). Cold response in *Saccharomyces*  
387 *cerevisiae*: New functions for old mechanisms. *FEMS Microbiology Reviews*, *31*(3),  
388 327–341. doi: 10.1111/j.1574-6976.2007.00066.x
- 389 Baird, S. E., & Stonesifer, R. (2012). Reproductive isolation in *Caenorhabditis briggsae*:  
390 Dysgenic interactions between maternal- and zygotic-effect loci result in a delayed  
391 development phenotype. *Reproductive Isolation in Caenorhabditis Briggsae:*  
392 *Dysgenic Interactions between Maternal- and Zygotic-Effect Loci Result in a*  
393 *Delayed Development Phenotype*, *1*(4), 189–195. doi: 10.4161/worm.23535
- 394 Crombie, T. A., Zdraljevic, S., Cook, D. E., Tanny, R. E., Brady, S. C., Wang, Y., ...  
395 Andersen, E. C. (2019). Deep sampling of Hawaiian *Caenorhabditis elegans*  
396 reveals high genetic diversity and admixture with global populations. *ELife*, *8*. doi:  
397 10.7554/eLife.50465
- 398 Culp, E., Richman, C., Sharanya, D., Jhaveri, N., Van Den Berg, W., & Gupta, B. P.  
399 (2020). Genome editing in the nematode *Caenorhabditis briggsae* using the  
400 CRISPR/Cas9 system. *Biology Methods and Protocols*, *5*(1), 1–5. doi:  
401 10.1093/biomethods/bpaa003
- 402 Cutter, A. D., Félix, M. A., Barrière, A., & Charlesworth, D. (2006). Patterns of  
403 nucleotide polymorphism distinguish temperate and tropical wild isolates of  
404 *Caenorhabditis briggsae*. *Genetics*, *173*(4), 2021–2031. doi:  
405 10.1534/genetics.106.058651
- 406 Flouris, A. D., & Piantoni, C. (2015). Links between thermoregulation and aging in  
407 endotherms and ectotherms. *Temperature*, *2*(1), 73–85. doi:  
408 10.4161/23328940.2014.989793
- 409 Friedland, A. E., Tzur, Y. B., Esvelt, K. M., Colaiácovo, M. P., Church, G. M., & Calarco,  
410 J. A. (2013). Heritable genome editing in *C. elegans* via a CRISPR-Cas9 system.  
411 *Nature Methods*, *10*(8), 741–743. doi: 10.1038/nmeth.2532
- 412 Graustein, A., Caspar, J. M., Walters, J. R., & Palopoli, M. F. (2002). Levels of DNA  
413 polymorphism vary with mating system in the nematode genus *Caenorhabditis*.  
414 *Genetics*, *161*(1), 99–107. doi: 10.1093/genetics/161.1.99
- 415 Hillier, L. D. W., Miller, R. D., Baird, S. E., Chinwalla, A., Fulton, L. A., Koboldt, D. C., &  
416 Waterston, R. H. (2007). Comparison of *C. elegans* and *C. briggsae* genome  
417 sequences reveals extensive conservation of chromosome organization and  
418 synteny. *PLoS Biology*, *5*(7), 1603–1616. doi: 10.1371/journal.pbio.0050167
- 419 Jiang, W., Wei, Y., Long, Y., Owen, A., Wang, B., Wu, X., ... Ma, D. K. (2018). A  
420 genetic program mediates cold-warming response and promotes stress-induced  
421 phenoptosis in *C. elegans*. *ELife*, *7*. doi: 10.7554/eLife.35037

- 422 Keto-Timonen, R., Hietala, N., Palonen, E., Hakakorpi, A., Lindström, M., & Korkeala, H.  
423 (2016). Cold Shock Proteins: A Minireview with Special Emphasis on Csp-family of  
424 Enteropathogenic *Yersinia*. *Frontiers in Microbiology*, 7(July), 1–7. doi:  
425 10.3389/fmicb.2016.01151
- 426 Kraemer, S. A., & Boynton, P. J. (2017). Evidence for microbial local adaptation in  
427 nature. *Molecular Ecology*, 26(7), 1860–1876. doi: 10.1111/mec.13958
- 428 Lacher, T. E., & Goldstein, M. I. (1997). Tropical ecotoxicology: Status and needs.  
429 *Environmental Toxicology and Chemistry*, 16(1), 100–111. doi: 10.1897/1551-  
430 5028(1997)016<0100:TESAN>2.3.CO;2
- 431 Ma, D. K., Li, Z., Lu, A. Y., Sun, F., Chen, S., Rothe, M., ... Horvitz, H. R. (2015). Acyl-  
432 CoA Dehydrogenase Drives Heat Adaptation by Sequestering Fatty Acids. *Cell*,  
433 161(5), 1152–1163. doi: 10.1016/j.cell.2015.04.026
- 434 Mark, S., Weiss, J., Sharma, E., Liu, T., Wang, W., Claycomb, J. M., & Cutter, A. D.  
435 (2019). Genome structure predicts modular transcriptome responses to genetic and  
436 environmental conditions. *Molecular Ecology*, 28(16), 3681–3697. doi:  
437 10.1111/mec.15185
- 438 McGaughan, A., & Sommer, R. J. (2014). Natural variation in cold tolerance in the  
439 nematode *Pristionchus pacificus*: The role of genotype and environment. *Biology*  
440 *Open*, 3(9), 832–838. doi: 10.1242/bio.20148888
- 441 Murray, P., Hayward, S. A. L., Govan, G. G., Gracey, A. Y., & Cossins, A. R. (2007). An  
442 explicit test of the phospholipid saturation hypothesis of acquired cold tolerance in  
443 *Caenorhabditis elegans*. *Proceedings of the National Academy of Sciences of the*  
444 *United States of America*, 104(13), 5489–5494. doi: 10.1073/pnas.0609590104
- 445 Nie, J., Mahato, S., Mustill, W., Tipping, C., Bhattacharya, S. S., & Zelhof, A. C. (2012).  
446 Cross species analysis of Prominin reveals a conserved cellular role in invertebrate  
447 and vertebrate photoreceptor cells. *Developmental Biology*, 371(2), 312–320. doi:  
448 10.1016/j.ydbio.2012.08.024
- 449 Ohta, A., Ujisawa, T., Sonoda, S., & Kuhara, A. (2014). Light and pheromone-sensing  
450 neurons regulates cold habituation through insulin signalling in *Caenorhabditis*  
451 *elegans*. *Nature Communications*, 5, 8–9. doi: 10.1038/ncomms5412
- 452 Okahata, M., Ohta, A., Mizutani, H., Minakuchi, Y., Toyoda, A., & Kuhara, A. (2016).  
453 Natural variations of cold tolerance and temperature acclimation in *Caenorhabditis*  
454 *elegans*. *Journal of Comparative Physiology B: Biochemical, Systemic, and*  
455 *Environmental Physiology*, 186(8), 985–998. doi: 10.1007/s00360-016-1011-3
- 456 Okahata, M., Wei, A. D., Ohta, A., & Kuhara, A. (2019). Cold acclimation via the KQT-2  
457 potassium channel is modulated by oxygen in *Caenorhabditis elegans*. *Science*  
458 *Advances*, 5(2), 1–13. doi: 10.1126/sciadv.aav3631
- 459 Petersen, C., Dirksen, P., & Schulenburg, H. (2015). Why we need more ecology for  
460 genetic models such as *C. elegans*. *Trends in Genetics : TIG*, 31(3), 120–127. doi:  
461 10.1016/j.tig.2014.12.001

- 462 Prasad, A., Croydon-Sugarman, M. J. F., Murray, R. L., & Cutter, A. D. (2011).  
463 Temperature-dependent fecundity associates with latitude in *Caenorhabditis*  
464 *briggsae*. *Evolution*, *65*(1), 52–63. doi: 10.1111/j.1558-5646.2010.01110.x
- 465 Rinehart, J. P., Li, A., Yocum, G. D., Robich, R. M., Hayward, S. A. L., & Denlinger, D. L.  
466 (2007). Up-regulation of heat shock proteins is essential for cold survival during  
467 insect diapause. *Proceedings of the National Academy of Sciences of the United*  
468 *States of America*, *104*(27), 11130–11137. doi: 10.1073/pnas.0703538104
- 469 Robinson, J. D., & Powell, J. R. (2016). Long-term recovery from acute cold shock in  
470 *Caenorhabditis elegans*. *BMC Cell Biology*, *17*, 2. doi: 10.1186/s12860-015-0079-z
- 471 Sanford, E., & Kelly, M. W. (2011). Local adaptation in marine invertebrates. *Annual*  
472 *Review of Marine Science*, *3*, 509–535. doi: 10.1146/annurev-marine-120709-  
473 142756
- 474 Savolainen, O., Lascoux, M., & Merilä, J. (2013). Ecological genomics of local  
475 adaptation. *Nature Reviews. Genetics*, *14*(11), 807–820. doi: 10.1038/nrg3522
- 476 Shore, A. M., Karamitri, A., Kemp, P., Speakman, J. R., Graham, N. S., & Lomax, M. A.  
477 (2013). Cold-Induced Changes in Gene Expression in Brown Adipose Tissue,  
478 White Adipose Tissue and Liver. *PLoS ONE*, *8*(7), 1–9. doi:  
479 10.1371/journal.pone.0068933
- 480 Sonna, L. A., Fujita, J., Gaffin, S. L., & Lilly, C. M. (2002). Invited review: Effects of heat  
481 and cold stress on mammalian gene expression. *Journal of Applied Physiology*  
482 (*Bethesda, Md. : 1985*), *92*(4), 1725–1742. doi: 10.1152/jappphysiol.01143.2001
- 483 Sonoda, S., Ohta, A., Maruo, A., Ujisawa, T., & Kuhara, A. (2016). Sperm Affects Head  
484 Sensory Neuron in Temperature Tolerance of *Caenorhabditis elegans*. *Cell Reports*,  
485 *16*(1), 56–65. doi: 10.1016/j.celrep.2016.05.078
- 486 Stegeman, G. W., Baird, S. E., Ryu, W. S., & Cutter, A. D. (2019). Genetically distinct  
487 behavioral modules underlie natural variation in thermal performance curves. *G3:*  
488 *Genes, Genomes, Genetics*, *9*(7), 2135–2151. doi: 10.1534/g3.119.400043
- 489 Stegeman, G. W., De Mesquita, M. B., Ryu, W. S., & Cutter, A. D. (2013). Temperature-  
490 dependent behaviours are genetically variable in the nematode *Caenorhabditis*  
491 *briggsae*. *Journal of Experimental Biology*, *216*(5), 850–858. doi:  
492 10.1242/jeb.075408
- 493 Stein, L. D., Bao, Z., Blasiar, D., Blumenthal, T., Brent, M. R., Chen, N., ... Waterston, R.  
494 H. (2003). The genome sequence of *Caenorhabditis briggsae*: A platform for  
495 comparative genomics. *PLoS Biology*, *1*(2). doi: 10.1371/journal.pbio.0000045
- 496 Sterken, M. G., Snoek, L. B., Kammenga, J. E., & Andersen, E. C. (2015). The  
497 laboratory domestication of *Caenorhabditis elegans*. *Trends in Genetics : TIG*,  
498 *31*(5), 224–231. doi: 10.1016/j.tig.2015.02.009
- 499 Takagaki, N., Ohta, A., Ohnishi, K., Kawanabe, A., Minakuchi, Y., Toyoda, A., ...  
500 Kuhara, A. (2020). The mechanoreceptor DEG-1 regulates cold tolerance in

501 Caenorhabditis elegans . *EMBO Reports*, 21(3), 1–14. doi:  
502 10.15252/embr.201948671

503 Ujisawa, T., Ohta, A., Ii, T., Minakuchi, Y., Toyoda, A., Ii, M., & Kuhara, A. (2018).  
504 Endoribonuclease ENDU-2 regulates multiple traits including cold tolerance via cell  
505 autonomous and nonautonomous controls in *Caenorhabditis elegans*. *Proceedings*  
506 *of the National Academy of Sciences of the United States of America*, 115(35),  
507 8823–8828. doi: 10.1073/pnas.1808634115

508 Wang, W., Chaturbedi, A., Wang, M., An, S., Velayudhan, S. S., & Lee, S. S. (2018).  
509 SET-9 and SET-26 are H3K4me3 readers and play critical roles in germline  
510 development and longevity. *ELife*, 7, 1–33. doi: 10.7554/eLife.34970

511 Yin, D., Schwarz, E. M., Thomas, C. G., Felde, R. L., Korf, I. F., Cutter, A. D., ... Haag,  
512 E. S. (2018). Rapid genome shrinkage in a self-fertile nematode reveals sperm  
513 competition proteins. *Science (New York, N.Y.)*, 359(6371), 55–61. doi:  
514 10.1126/science.aao0827

515

## 516 Data Accessibility

517 All raw transcriptome data are available at GEO: GSE171725 and SRA: SRP314054.

## 518 Author Contributions

519 W.W., A.G.F., J.L.G., and R.B.B. designed research; W.W. and A.G.F. performed  
520 research; W.W. and A.G.F. analyzed data; W.W., A.G.F., J.L.G., and R.B.B. wrote and  
521 edited the manuscript. All authors read and approved the final manuscript.

## 522 Figure and table captions

523 **Table 1. Collection localities of tropical and temperate *C. briggsae* strains.**

524 **Figure 1. Cold survival differentiates tropical and temperate *C. briggsae*.** Each bar  
525 reports the mean proportion of animals of the indicated *C. briggsae* strain surviving after  
526 development at 20°C followed by 60 hours of incubation at 4°C, across ≥ 3 biological  
527 replicates. Error bars indicate ±1 standard error of the mean. See Table 1 for strain  
528 information.

529 **Figure 2. Temperate *C. briggsae* strain HK104 is much more cold-tolerant than**  
530 **tropical strain AF16 regardless of rearing temperature.** Symbols are as in Figure 1,  
531 except that rearing temperature was 15°C (left), 20°C (middle), or 25°C (right) before  
532 cold shock.

533 **Figure 3. Cold-evoked expression programs shared between AF16 and HK104. (a)**  
534 Shown are the results of principal component analysis of transcriptomes of *C. briggsae*  
535 temperate HK104 and tropical AF16 before and after cold treatment (60 hours of  
536 incubation at 4°C after development at 20°C). Each point reports values of the first (x-  
537 axis) and second (y-axis) principal component from one replicate of the indicated strain  
538 and condition. **(b)** Top, each circle reports the number of genes in the indicated strain

539 with lower expression upon cold treatment than in control conditions. White values  
540 report the number of such genes detected only in AF16 (left), only in HK104 (right), or in  
541 both strains (center). Bottom, data are as at top except that genes with higher  
542 expression in cold conditions were analyzed. **(d)** Each bar reports enrichment (as a ratio  
543 of the number observed to the number expected under a genomic null) of genes with  
544 the indicated function among those detected in AF16 and HK104 as down-regulated  
545 under cold treatment. **(e)** Data are as in **(d)** except that genes with higher expression in  
546 cold conditions were analyzed.

547 **Figure 4. Cold-evoked expression programs that differ between AF16 and HK104.**  
548 Shown are genes with significant strain-by-temperature effects on expression, in  
549 analyses of transcriptomes from **Figure 3**. Each row reports expression measurements  
550 for one gene; each column reports a comparison of one replicate of temperate *C.*  
551 *briggsae* HK104 and tropical AF16 treated at the indicated temperature.

552 **Figure 5. Cold tolerance variation across wild *C. elegans* isolates.** Symbols are as  
553 in Figure 1 except that wild *C. elegans* strains were analyzed; see Supplementary Table  
554 2 for strain information.

555 **Figure 6. *C. elegans* mutant screen reveals seven genes that impair cold**  
556 **tolerance.** Each bar reports cold tolerance in the *C. elegans* laboratory N2 strain (wild-  
557 type) or an isogenic strain harboring a mutation (-) in the indicated gene(s). Symbols are  
558 as in Figure 1 except that cold treatment was 120 hours. Asterisks report results from a  
559 one-sided *t*-test comparing the indicated strain to wild-type N2; \*,  $p < 0.05$ ; \*\*,  $p < 0.01$ .

560 **Figure 7. Four genes are important for HK104 cold tolerance. (a)** Each bar reports  
561 cold tolerance in the temperate *C. briggsae* HK104 strain (wild-type) or an isogenic  
562 strain harboring a mutation (-) in the indicated gene. Symbols are as in Figure 1 except  
563 that cold exposure was for the time indicated. **(b)** Symbols are as in (a) except that the  
564 tropical *C. briggsae* AF16 strain was analyzed. Asterisks report results from a one-sided  
565 *t*-test comparing the indicated strain to the wild-type of its respective background; \*,  $p <$   
566  $0.05$ ; \*\*,  $p < 0.01$ . See Supplementary Table 3 for strain information.

567 **Supplemental Figure 1.** Symbols are as in Figure 2 of the main text, except that worms  
568 were exposed to cold shock for 7 days.

569 **Supplemental Figure 2.** Shown are genes with significant strain-by-temperature effects  
570 on expression, in analyses of transcriptomes from **Figure 3**. Each row reports  
571 expression measurements for one gene; each column reports a comparison of one  
572 replicate of cold-treated (4°C) and control (20°C) worms of the indicated *C. briggsae*  
573 strain.

574 **Supplemental Table 1. RNA seq analysis.** In the first two tabs, each row reports  
575 results from a comparison of expression of the indicated gene in the indicated strain  
576 between cold-treated animals and untreated controls. The first column reports  $\log_2$   
577 of the expression fold-change between treatments, as an average over two biological  
578 replicates; the remaining columns report, respectively, the F-statistic, nominal  $p$ -value,  
579 and multiple-testing-adjusted  $p$ -value from the treatment term of a generalized linear  
580 model. In the third tab, the first column reports the  $\log_2$  of the expression fold-change

581 between conditions in HK104, divided by the analogous quantity in AF16; the remaining  
582 columns report, respectively, the F-statistic, nominal  $p$ -value, and multiple-testing-  
583 adjusted  $p$ -value from the strain-by-treatment interaction term of a generalized linear  
584 model. In the fourth tab, data are analogous to those in the first two tabs except that  
585 allele-specific expression in the HK104 x AF16 F1 hybrid was analyzed.

586 **Supplemental Table 2. Collection localities of wild *C. elegans* strains.**

587 **Supplemental Table 3. *C. briggsae* mutants.** Each pair of rows reports the context of  
588 a Cas9-induced mutation (red) in the indicated gene of the indicated *C. briggsae* strain.  
589 Uppercase, exonic sequence; lowercase, intronic sequence.

590



## 381 **References**

- 382 Adrion, J. R., Hahn, M. W., & Cooper, B. S. (2015). Revisiting classic clines in  
383 *Drosophila melanogaster* in the age of genomics. *Trends in Genetics : TIG*, *31*(8),  
384 434–444. doi: 10.1016/j.tig.2015.05.006
- 385 Aguilera, J., Randez-Gil, F., & Prieto, J. A. (2007). Cold response in *Saccharomyces*  
386 *cerevisiae*: New functions for old mechanisms. *FEMS Microbiology Reviews*, *31*(3),  
387 327–341. doi: 10.1111/j.1574-6976.2007.00066.x
- 388 Baird, S. E., & Stonesifer, R. (2012). Reproductive isolation in *Caenorhabditis briggsae*:  
389 Dysgenic interactions between maternal- and zygotic-effect loci result in a delayed  
390 development phenotype. *Reproductive Isolation in Caenorhabditis Briggsae:*  
391 *Dysgenic Interactions between Maternal- and Zygotic-Effect Loci Result in a*  
392 *Delayed Development Phenotype*, *1*(4), 189–195. doi: 10.4161/worm.23535
- 393 Crombie, T. A., Zdraljevic, S., Cook, D. E., Tanny, R. E., Brady, S. C., Wang, Y., ...  
394 Andersen, E. C. (2019). Deep sampling of Hawaiian *Caenorhabditis elegans*  
395 reveals high genetic diversity and admixture with global populations. *ELife*, *8*. doi:  
396 10.7554/eLife.50465
- 397 Culp, E., Richman, C., Sharanya, D., Jhaveri, N., Van Den Berg, W., & Gupta, B. P.  
398 (2020). Genome editing in the nematode *Caenorhabditis briggsae* using the  
399 CRISPR/Cas9 system. *Biology Methods and Protocols*, *5*(1), 1–5. doi:  
400 10.1093/biomethods/bpaa003
- 401 Cutter, A. D., Félix, M. A., Barrière, A., & Charlesworth, D. (2006). Patterns of  
402 nucleotide polymorphism distinguish temperate and tropical wild isolates of  
403 *Caenorhabditis briggsae*. *Genetics*, *173*(4), 2021–2031. doi:  
404 10.1534/genetics.106.058651
- 405 Flouris, A. D., & Piantoni, C. (2015). Links between thermoregulation and aging in  
406 endotherms and ectotherms. *Temperature*, *2*(1), 73–85. doi:  
407 10.4161/23328940.2014.989793
- 408 Friedland, A. E., Tzur, Y. B., Esvelt, K. M., Colaiácovo, M. P., Church, G. M., & Calarco,  
409 J. A. (2013). Heritable genome editing in *C. elegans* via a CRISPR-Cas9 system.  
410 *Nature Methods*, *10*(8), 741–743. doi: 10.1038/nmeth.2532
- 411 Graustein, A., Caspar, J. M., Walters, J. R., & Palopoli, M. F. (2002). Levels of DNA  
412 polymorphism vary with mating system in the nematode genus *Caenorhabditis*.  
413 *Genetics*, *161*(1), 99–107. doi: 10.1093/genetics/161.1.99
- 414 Hillier, L. D. W., Miller, R. D., Baird, S. E., Chinwalla, A., Fulton, L. A., Koboldt, D. C., &  
415 Waterston, R. H. (2007). Comparison of *C. elegans* and *C. briggsae* genome  
416 sequences reveals extensive conservation of chromosome organization and  
417 synteny. *PLoS Biology*, *5*(7), 1603–1616. doi: 10.1371/journal.pbio.0050167
- 418 Jiang, W., Wei, Y., Long, Y., Owen, A., Wang, B., Wu, X., ... Ma, D. K. (2018). A  
419 genetic program mediates cold-warming response and promotes stress-induced  
420 phenoptosis in *C. elegans*. *ELife*, *7*. doi: 10.7554/eLife.35037

- 421 Keto-Timonen, R., Hietala, N., Palonen, E., Hakakorpi, A., Lindström, M., & Korkeala, H.  
422 (2016). Cold Shock Proteins: A Minireview with Special Emphasis on Csp-family of  
423 Enteropathogenic *Yersinia*. *Frontiers in Microbiology*, 7(July), 1–7. doi:  
424 10.3389/fmicb.2016.01151
- 425 Kraemer, S. A., & Boynton, P. J. (2017). Evidence for microbial local adaptation in  
426 nature. *Molecular Ecology*, 26(7), 1860–1876. doi: 10.1111/mec.13958
- 427 Lacher, T. E., & Goldstein, M. I. (1997). Tropical ecotoxicology: Status and needs.  
428 *Environmental Toxicology and Chemistry*, 16(1), 100–111. doi: 10.1897/1551-  
429 5028(1997)016<0100:TESAN>2.3.CO;2
- 430 Ma, D. K., Li, Z., Lu, A. Y., Sun, F., Chen, S., Rothe, M., ... Horvitz, H. R. (2015). Acyl-  
431 CoA Dehydrogenase Drives Heat Adaptation by Sequestering Fatty Acids. *Cell*,  
432 161(5), 1152–1163. doi: 10.1016/j.cell.2015.04.026
- 433 Mark, S., Weiss, J., Sharma, E., Liu, T., Wang, W., Claycomb, J. M., & Cutter, A. D.  
434 (2019). Genome structure predicts modular transcriptome responses to genetic and  
435 environmental conditions. *Molecular Ecology*, 28(16), 3681–3697. doi:  
436 10.1111/mec.15185
- 437 McGaughan, A., & Sommer, R. J. (2014). Natural variation in cold tolerance in the  
438 nematode *Pristionchus pacificus*: The role of genotype and environment. *Biology*  
439 *Open*, 3(9), 832–838. doi: 10.1242/bio.20148888
- 440 Murray, P., Hayward, S. A. L., Govan, G. G., Gracey, A. Y., & Cossins, A. R. (2007). An  
441 explicit test of the phospholipid saturation hypothesis of acquired cold tolerance in  
442 *Caenorhabditis elegans*. *Proceedings of the National Academy of Sciences of the*  
443 *United States of America*, 104(13), 5489–5494. doi: 10.1073/pnas.0609590104
- 444 Nie, J., Mahato, S., Mustill, W., Tipping, C., Bhattacharya, S. S., & Zelhof, A. C. (2012).  
445 Cross species analysis of Prominin reveals a conserved cellular role in invertebrate  
446 and vertebrate photoreceptor cells. *Developmental Biology*, 371(2), 312–320. doi:  
447 10.1016/j.ydbio.2012.08.024
- 448 Ohta, A., Ujisawa, T., Sonoda, S., & Kuhara, A. (2014). Light and pheromone-sensing  
449 neurons regulates cold habituation through insulin signalling in *Caenorhabditis*  
450 *elegans*. *Nature Communications*, 5, 8–9. doi: 10.1038/ncomms5412
- 451 Okahata, M., Ohta, A., Mizutani, H., Minakuchi, Y., Toyoda, A., & Kuhara, A. (2016).  
452 Natural variations of cold tolerance and temperature acclimation in *Caenorhabditis*  
453 *elegans*. *Journal of Comparative Physiology B: Biochemical, Systemic, and*  
454 *Environmental Physiology*, 186(8), 985–998. doi: 10.1007/s00360-016-1011-3
- 455 Okahata, M., Wei, A. D., Ohta, A., & Kuhara, A. (2019). Cold acclimation via the KQT-2  
456 potassium channel is modulated by oxygen in *Caenorhabditis elegans*. *Science*  
457 *Advances*, 5(2), 1–13. doi: 10.1126/sciadv.aav3631
- 458 Petersen, C., Dirksen, P., & Schulenburg, H. (2015). Why we need more ecology for  
459 genetic models such as *C. elegans*. *Trends in Genetics : TIG*, 31(3), 120–127. doi:  
460 10.1016/j.tig.2014.12.001

- 461 Prasad, A., Croydon-Sugarman, M. J. F., Murray, R. L., & Cutter, A. D. (2011).  
462 Temperature-dependent fecundity associates with latitude in *Caenorhabditis*  
463 *briggsae*. *Evolution*, *65*(1), 52–63. doi: 10.1111/j.1558-5646.2010.01110.x
- 464 Rinehart, J. P., Li, A., Yocum, G. D., Robich, R. M., Hayward, S. A. L., & Denlinger, D. L.  
465 (2007). Up-regulation of heat shock proteins is essential for cold survival during  
466 insect diapause. *Proceedings of the National Academy of Sciences of the United*  
467 *States of America*, *104*(27), 11130–11137. doi: 10.1073/pnas.0703538104
- 468 Robinson, J. D., & Powell, J. R. (2016). Long-term recovery from acute cold shock in  
469 *Caenorhabditis elegans*. *BMC Cell Biology*, *17*, 2. doi: 10.1186/s12860-015-0079-z
- 470 Sanford, E., & Kelly, M. W. (2011). Local adaptation in marine invertebrates. *Annual*  
471 *Review of Marine Science*, *3*, 509–535. doi: 10.1146/annurev-marine-120709-  
472 142756
- 473 Savolainen, O., Lascoux, M., & Merilä, J. (2013). Ecological genomics of local  
474 adaptation. *Nature Reviews. Genetics*, *14*(11), 807–820. doi: 10.1038/nrg3522
- 475 Shore, A. M., Karamitri, A., Kemp, P., Speakman, J. R., Graham, N. S., & Lomax, M. A.  
476 (2013). Cold-Induced Changes in Gene Expression in Brown Adipose Tissue,  
477 White Adipose Tissue and Liver. *PLoS ONE*, *8*(7), 1–9. doi:  
478 10.1371/journal.pone.0068933
- 479 Sonna, L. A., Fujita, J., Gaffin, S. L., & Lilly, C. M. (2002). Invited review: Effects of heat  
480 and cold stress on mammalian gene expression. *Journal of Applied Physiology*  
481 *(Bethesda, Md. : 1985)*, *92*(4), 1725–1742. doi: 10.1152/jappphysiol.01143.2001
- 482 Sonoda, S., Ohta, A., Maruo, A., Ujisawa, T., & Kuhara, A. (2016). Sperm Affects Head  
483 Sensory Neuron in Temperature Tolerance of *Caenorhabditis elegans*. *Cell Reports*,  
484 *16*(1), 56–65. doi: 10.1016/j.celrep.2016.05.078
- 485 Stegeman, G. W., Baird, S. E., Ryu, W. S., & Cutter, A. D. (2019). Genetically distinct  
486 behavioral modules underlie natural variation in thermal performance curves. *G3:*  
487 *Genes, Genomes, Genetics*, *9*(7), 2135–2151. doi: 10.1534/g3.119.400043
- 488 Stegeman, G. W., De Mesquita, M. B., Ryu, W. S., & Cutter, A. D. (2013). Temperature-  
489 dependent behaviours are genetically variable in the nematode *Caenorhabditis*  
490 *briggsae*. *Journal of Experimental Biology*, *216*(5), 850–858. doi:  
491 10.1242/jeb.075408
- 492 Stein, L. D., Bao, Z., Blasiar, D., Blumenthal, T., Brent, M. R., Chen, N., ... Waterston, R.  
493 H. (2003). The genome sequence of *Caenorhabditis briggsae*: A platform for  
494 comparative genomics. *PLoS Biology*, *1*(2). doi: 10.1371/journal.pbio.0000045
- 495 Sterken, M. G., Snoek, L. B., Kammenga, J. E., & Andersen, E. C. (2015). The  
496 laboratory domestication of *Caenorhabditis elegans*. *Trends in Genetics : TIG*,  
497 *31*(5), 224–231. doi: 10.1016/j.tig.2015.02.009
- 498 Takagaki, N., Ohta, A., Ohnishi, K., Kawanabe, A., Minakuchi, Y., Toyoda, A., ...  
499 Kuhara, A. (2020). The mechanoreceptor DEG-1 regulates cold tolerance in

500 Caenorhabditis elegans . *EMBO Reports*, 21(3), 1–14. doi:  
501 10.15252/embr.201948671

502 Ujisawa, T., Ohta, A., Ii, T., Minakuchi, Y., Toyoda, A., Ii, M., & Kuhara, A. (2018).  
503 Endoribonuclease ENDU-2 regulates multiple traits including cold tolerance via cell  
504 autonomous and nonautonomous controls in *Caenorhabditis elegans*. *Proceedings*  
505 *of the National Academy of Sciences of the United States of America*, 115(35),  
506 8823–8828. doi: 10.1073/pnas.1808634115

507 Wang, W., Chaturbedi, A., Wang, M., An, S., Velayudhan, S. S., & Lee, S. S. (2018).  
508 SET-9 and SET-26 are H3K4me3 readers and play critical roles in germline  
509 development and longevity. *ELife*, 7, 1–33. doi: 10.7554/eLife.34970

510 Yin, D., Schwarz, E. M., Thomas, C. G., Felde, R. L., Korf, I. F., Cutter, A. D., ... Haag,  
511 E. S. (2018). Rapid genome shrinkage in a self-fertile nematode reveals sperm  
512 competition proteins. *Science (New York, N.Y.)*, 359(6371), 55–61. doi:  
513 10.1126/science.aao0827

514

## 515 Data Accessibility

516 All raw transcriptome data are available at GEO: GSE171725 and SRA: SRP314054.

## 517 Author Contributions

518 W.W., A.G.F., J.L.G., and R.B.B. designed research; W.W. and A.G.F. performed  
519 research; W.W. and A.G.F. analyzed data; W.W., A.G.F., J.L.G., and R.B.B. wrote and  
520 edited the manuscript. All authors read and approved the final manuscript.

## 521 Figure and table captions

522 **Table 1. Collection localities of tropical and temperate *C. briggsae* strains.**

523 **Figure 1. Cold survival differentiates tropical and temperate *C. briggsae*.** Each bar  
524 reports the mean proportion of animals of the indicated *C. briggsae* strain surviving after  
525 development at 20°C followed by 60 hours of incubation at 4°C, across  $\geq 3$  biological  
526 replicates. Error bars indicate  $\pm 1$  standard error of the mean. See Table 1 for strain  
527 information.

528 **Figure 2. Temperate *C. briggsae* strain HK104 is much more cold-tolerant than**  
529 **tropical strain AF16 regardless of rearing temperature.** Symbols are as in Figure 1,  
530 except that rearing temperature was 15°C (left), 20°C (middle), or 25°C (right) before  
531 cold shock.

532 **Figure 3. Cold-evoked expression programs shared between AF16 and HK104. (a)**  
533 Shown are the results of principal component analysis of transcriptomes of *C. briggsae*  
534 temperate HK104 and tropical AF16 before and after cold treatment (60 hours of  
535 incubation at 4°C after development at 20°C). Each point reports values of the first (*x*-  
536 axis) and second (*y*-axis) principal component from one replicate of the indicated strain  
537 and condition. **(b)** Top, each circle reports the number of genes in the indicated strain

538 with lower expression upon cold treatment than in control conditions. White values  
539 report the number of such genes detected only in AF16 (left), only in HK104 (right), or in  
540 both strains (center). Bottom, data are as at top except that genes with higher  
541 expression in cold conditions were analyzed. **(d)** Each bar reports enrichment (as a ratio  
542 of the number observed to the number expected under a genomic null) of genes with  
543 the indicated function among those detected in AF16 and HK104 as down-regulated  
544 under cold treatment. **(e)** Data are as in **(d)** except that genes with higher expression in  
545 cold conditions were analyzed.

546 **Figure 4. Cold-evoked expression programs that differ between AF16 and HK104.**  
547 Shown are genes with significant strain-by-temperature effects on expression, in  
548 analyses of transcriptomes from **Figure 3**. Each row reports expression measurements  
549 for one gene; each column reports a comparison of one replicate of temperate *C.*  
550 *briggsae* HK104 and tropical AF16 treated at the indicated temperature.

551 **Figure 5. Cold tolerance variation across wild *C. elegans* isolates.** Symbols are as  
552 in Figure 1 except that wild *C. elegans* strains were analyzed; see Supplementary Table  
553 2 for strain information.

554 **Figure 6. *C. elegans* mutant screen reveals seven genes that impair cold**  
555 **tolerance.** Each bar reports cold tolerance in the *C. elegans* laboratory N2 strain (wild-  
556 type) or an isogenic strain harboring a mutation (-) in the indicated gene(s). Symbols are  
557 as in Figure 1 except that cold treatment was 120 hours. Asterisks report results from a  
558 one-sided *t*-test comparing the indicated strain to wild-type N2; \*,  $p < 0.05$ ; \*\*,  $p < 0.01$ .

559 **Figure 7. Four genes are important for HK104 cold tolerance. (a)** Each bar reports  
560 cold tolerance in the temperate *C. briggsae* HK104 strain (wild-type) or an isogenic  
561 strain harboring a mutation (-) in the indicated gene. Symbols are as in Figure 1 except  
562 that cold exposure was for the time indicated. **(b)** Symbols are as in (a) except that the  
563 tropical *C. briggsae* AF16 strain was analyzed. Asterisks report results from a one-sided  
564 *t*-test comparing the indicated strain to the wild-type of its respective background; \*,  $p <$   
565  $0.05$ ; \*\*,  $p < 0.01$ . See Supplementary Table 3 for strain information.

566 **Supplemental Figure 1.** Symbols are as in Figure 2 of the main text, except that worms  
567 were exposed to cold shock for 7 days.

568 **Supplemental Figure 2.** Shown are genes with significant strain-by-temperature effects  
569 on expression, in analyses of transcriptomes from **Figure 3**. Each row reports  
570 expression measurements for one gene; each column reports a comparison of one  
571 replicate of cold-treated (4°C) and control (20°C) worms of the indicated *C. briggsae*  
572 strain.

573 **Supplemental Table 1. RNA seq analysis.** In the first two tabs, each row reports  
574 results from a comparison of expression of the indicated gene in the indicated strain  
575 between cold-treated animals and untreated controls. The first column reports  $\log_2$   
576 of the expression fold-change between treatments, as an average over two biological  
577 replicates; the remaining columns report, respectively, the F-statistic, nominal  $p$ -value,  
578 and multiple-testing-adjusted  $p$ -value from the treatment term of a generalized linear  
579 model. In the third tab, the first column reports the  $\log_2$  of the expression fold-change

580 between conditions in HK104, divided by the analogous quantity in AF16; the remaining  
581 columns report, respectively, the F-statistic, nominal  $p$ -value, and multiple-testing-  
582 adjusted  $p$ -value from the strain-by-treatment interaction term of a generalized linear  
583 model. In the fourth tab, data are analogous to those in the first two tabs except that  
584 allele-specific expression in the HK104 x AF16 F1 hybrid was analyzed.

585 **Supplemental Table 2. Collection localities of wild *C. elegans* strains.**

586 **Supplemental Table 3. *C. briggsae* mutants.** Each pair of rows reports the context of  
587 a Cas9-induced mutation (red) in the indicated gene of the indicated *C. briggsae* strain.  
588 Uppercase, exonic sequence; lowercase, intronic sequence.

589

**Table 1**

| Strain | Locality of origin        | Phylogeographic group | Latitude | Approximate elevation (m) | Mean winter temperature (°C min, max) | Mean summer temperature (°C min, max) |
|--------|---------------------------|-----------------------|----------|---------------------------|---------------------------------------|---------------------------------------|
| AF16   | Ahmedabad, India          | Tropical              | 23° 01'N | 50                        | 14.4, 29.4                            | 26.1, 33.9                            |
| VT847  | Hawaii, USA               | Tropical              | 20° 57'N | 930                       | 18.9, 26.1                            | 22.8, 29.4                            |
| ED3083 | Johannesburg, S. Africa   | Tropical              | 26° 10'N | 1,750                     | 2.8, 18.9                             | 15.6, 27.2                            |
| JU726  | Chengyang Village, China  | Tropical              | 44° 28'N | 11                        | 3.9, 12.8                             | 24.4, 34.4                            |
| QX1410 | St. Lucia                 | Tropical              | 13° 22'N | 14                        | 23.0, 27.0                            | 25.0, 31.0                            |
| HK104  | Okayama, Japan            | Temperate             | 34° 40'N | 30                        | 0, 8.3                                | 22.8, 30.6                            |
| PB826  | Ohio, USA                 | Temperate             | 39° 34'N | 270                       | -6.1, 2.8                             | 17.8, 30                              |
| JU439  | Reykjavik, Iceland        | Temperate             | 64° 08'N | 16                        | -2.2, 2.2                             | 8.9, 14.4                             |
| EG4181 | Salt Lake City, Utah, USA | Temperate             | 40° 42'N | 1,290                     | -7.8, 2.8                             | 15.6, 34.4                            |
| VX34   | Guangshui, Hubei, China   | Temperate             | 30° 58'N | 80                        | -6.1, 0                               | 13.8, 23.9                            |

**Figure 1**

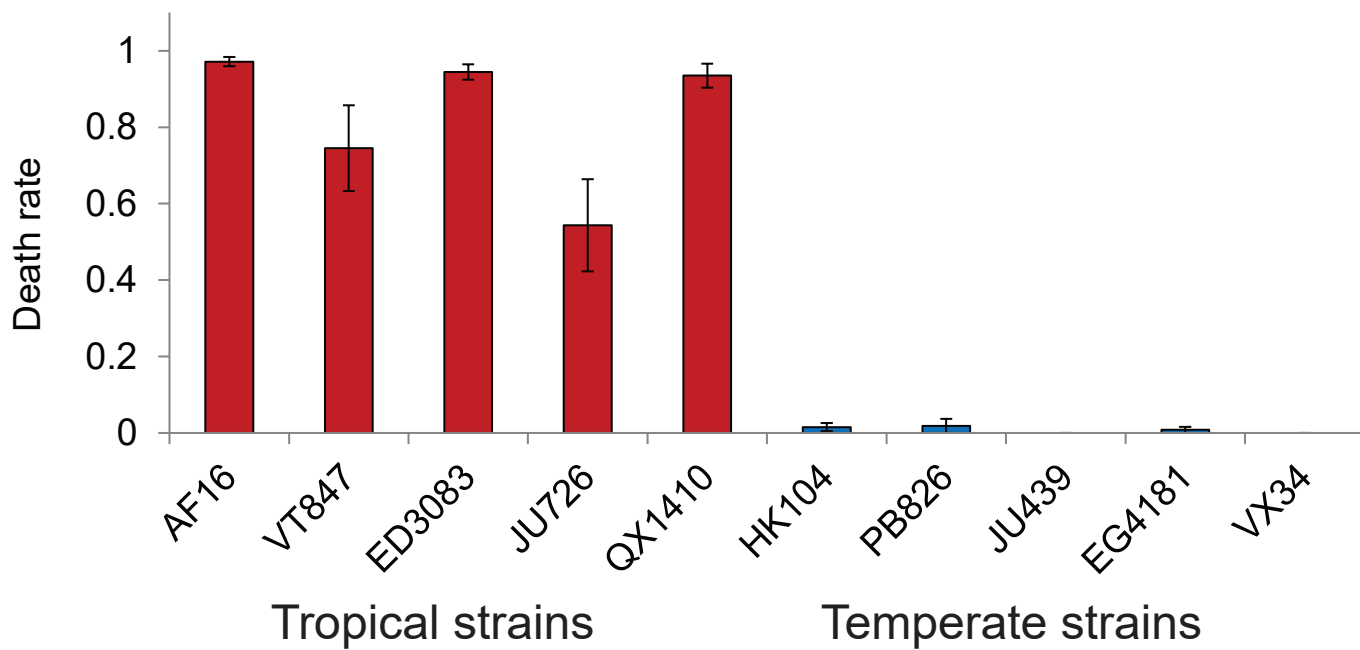



**Figure 2**

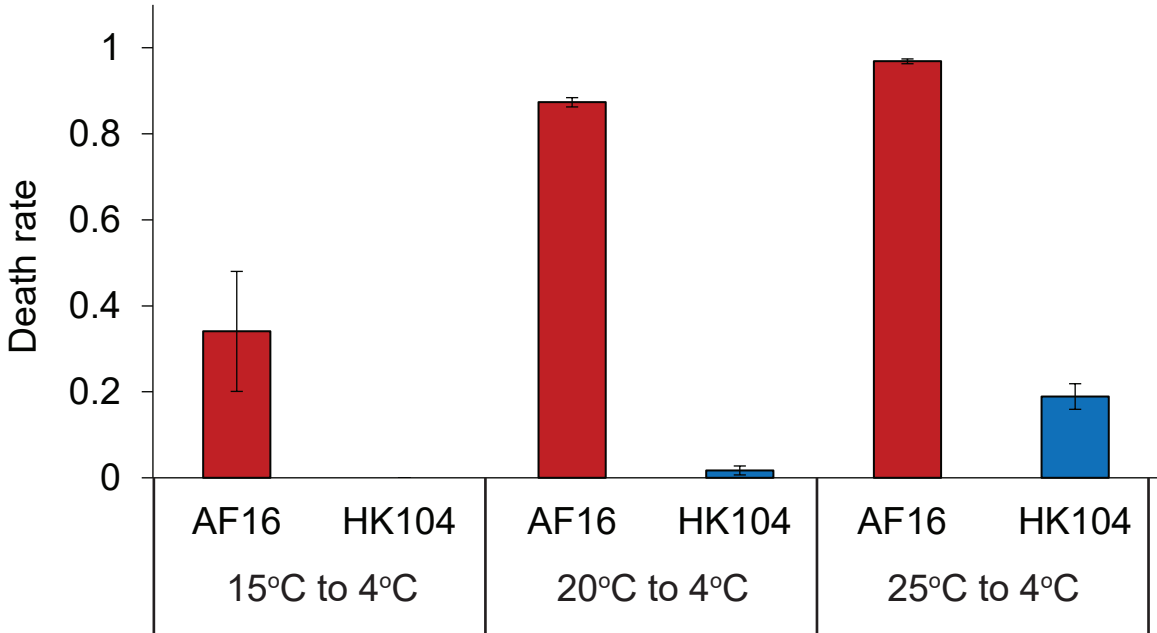

## Figure 3

3a

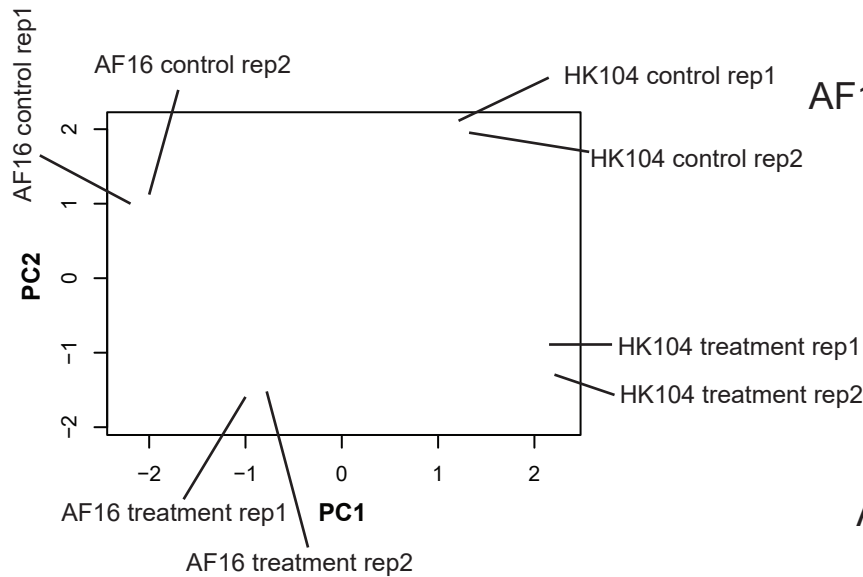

3b

Down-regulated genes after cold

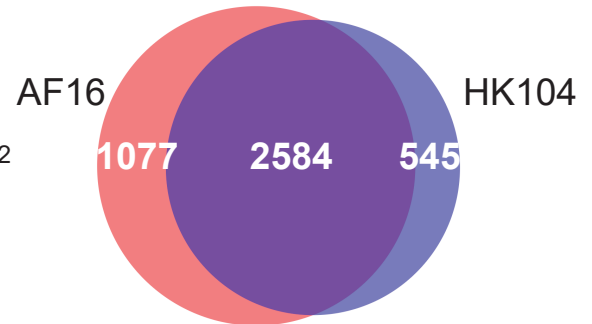

Up-regulated genes after cold

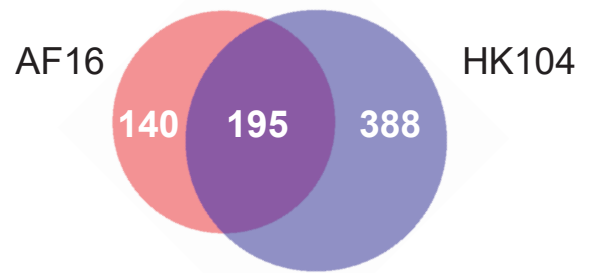

3c

Up-regulated genes after cold in AF16 and HK104

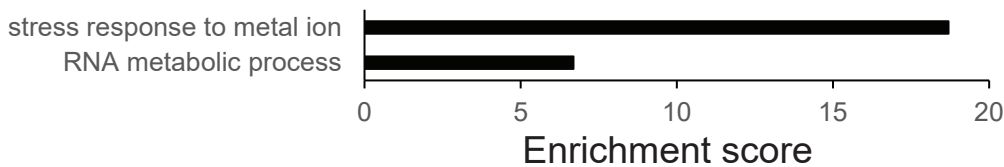

3d

Down-regulated genes after cold in AF16 and HK104

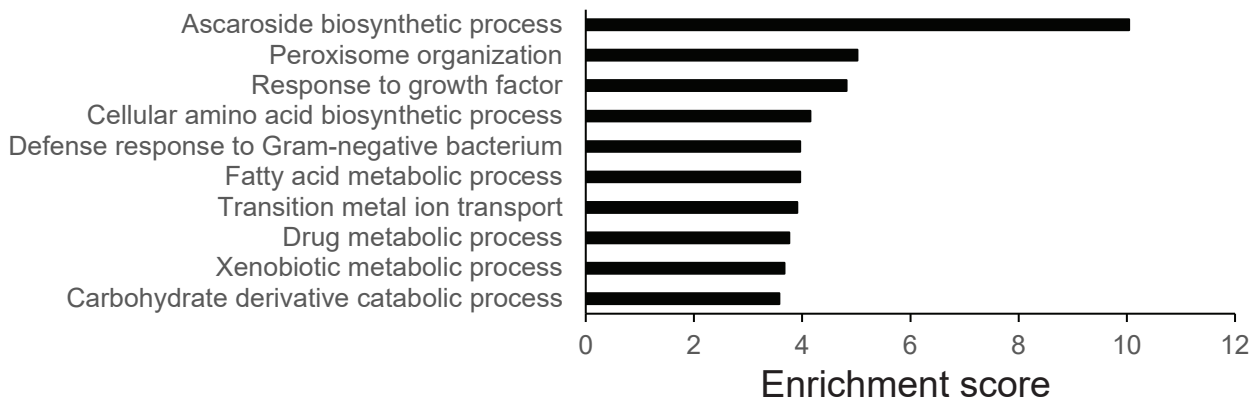

## Figure 4

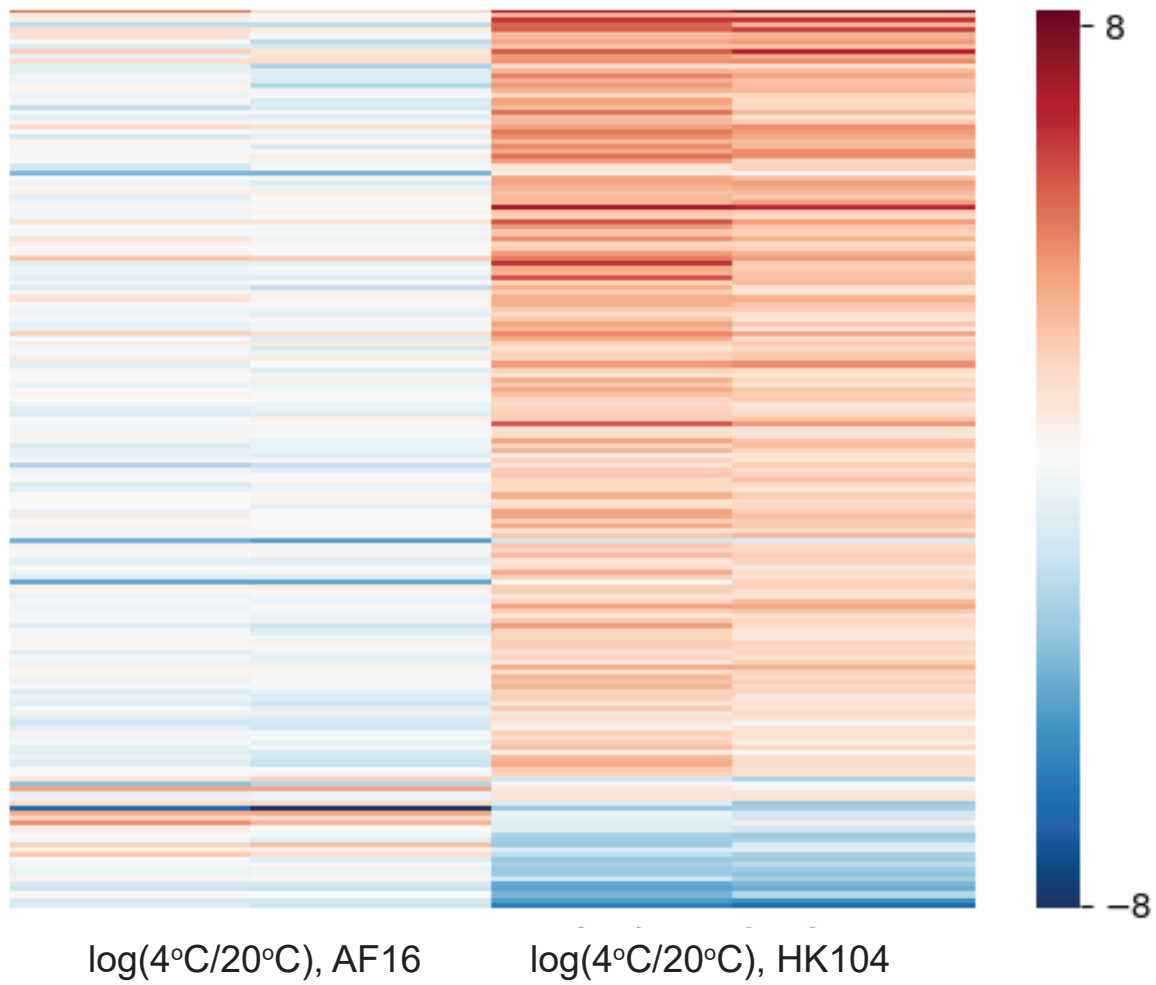

**Figure 5**

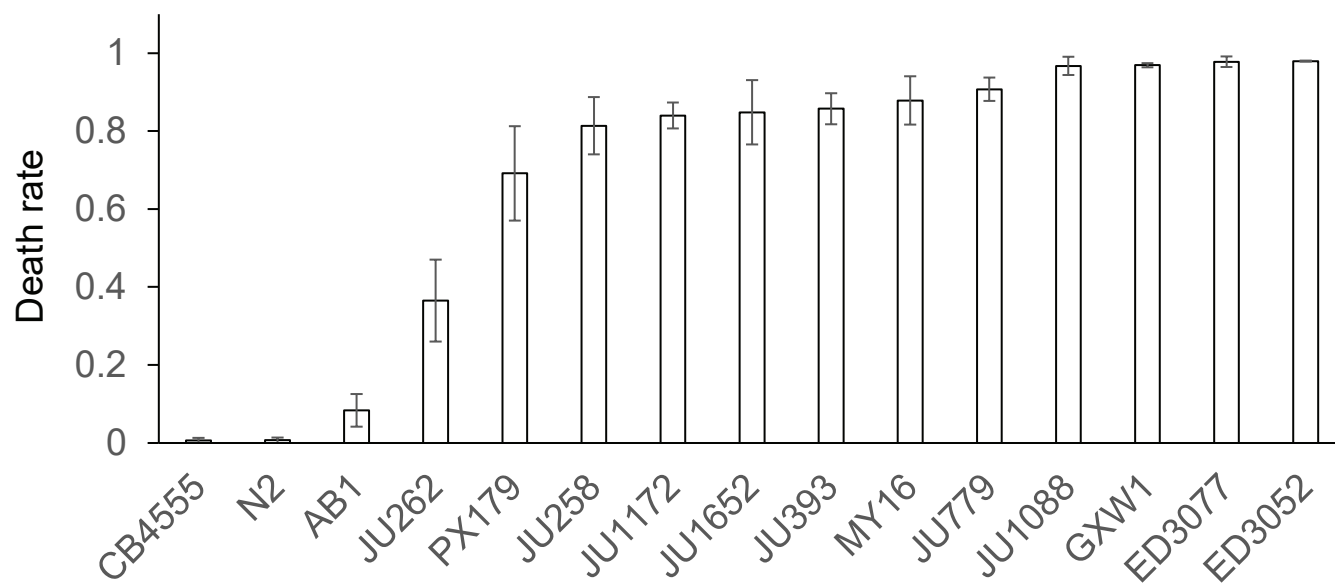

Figure 6

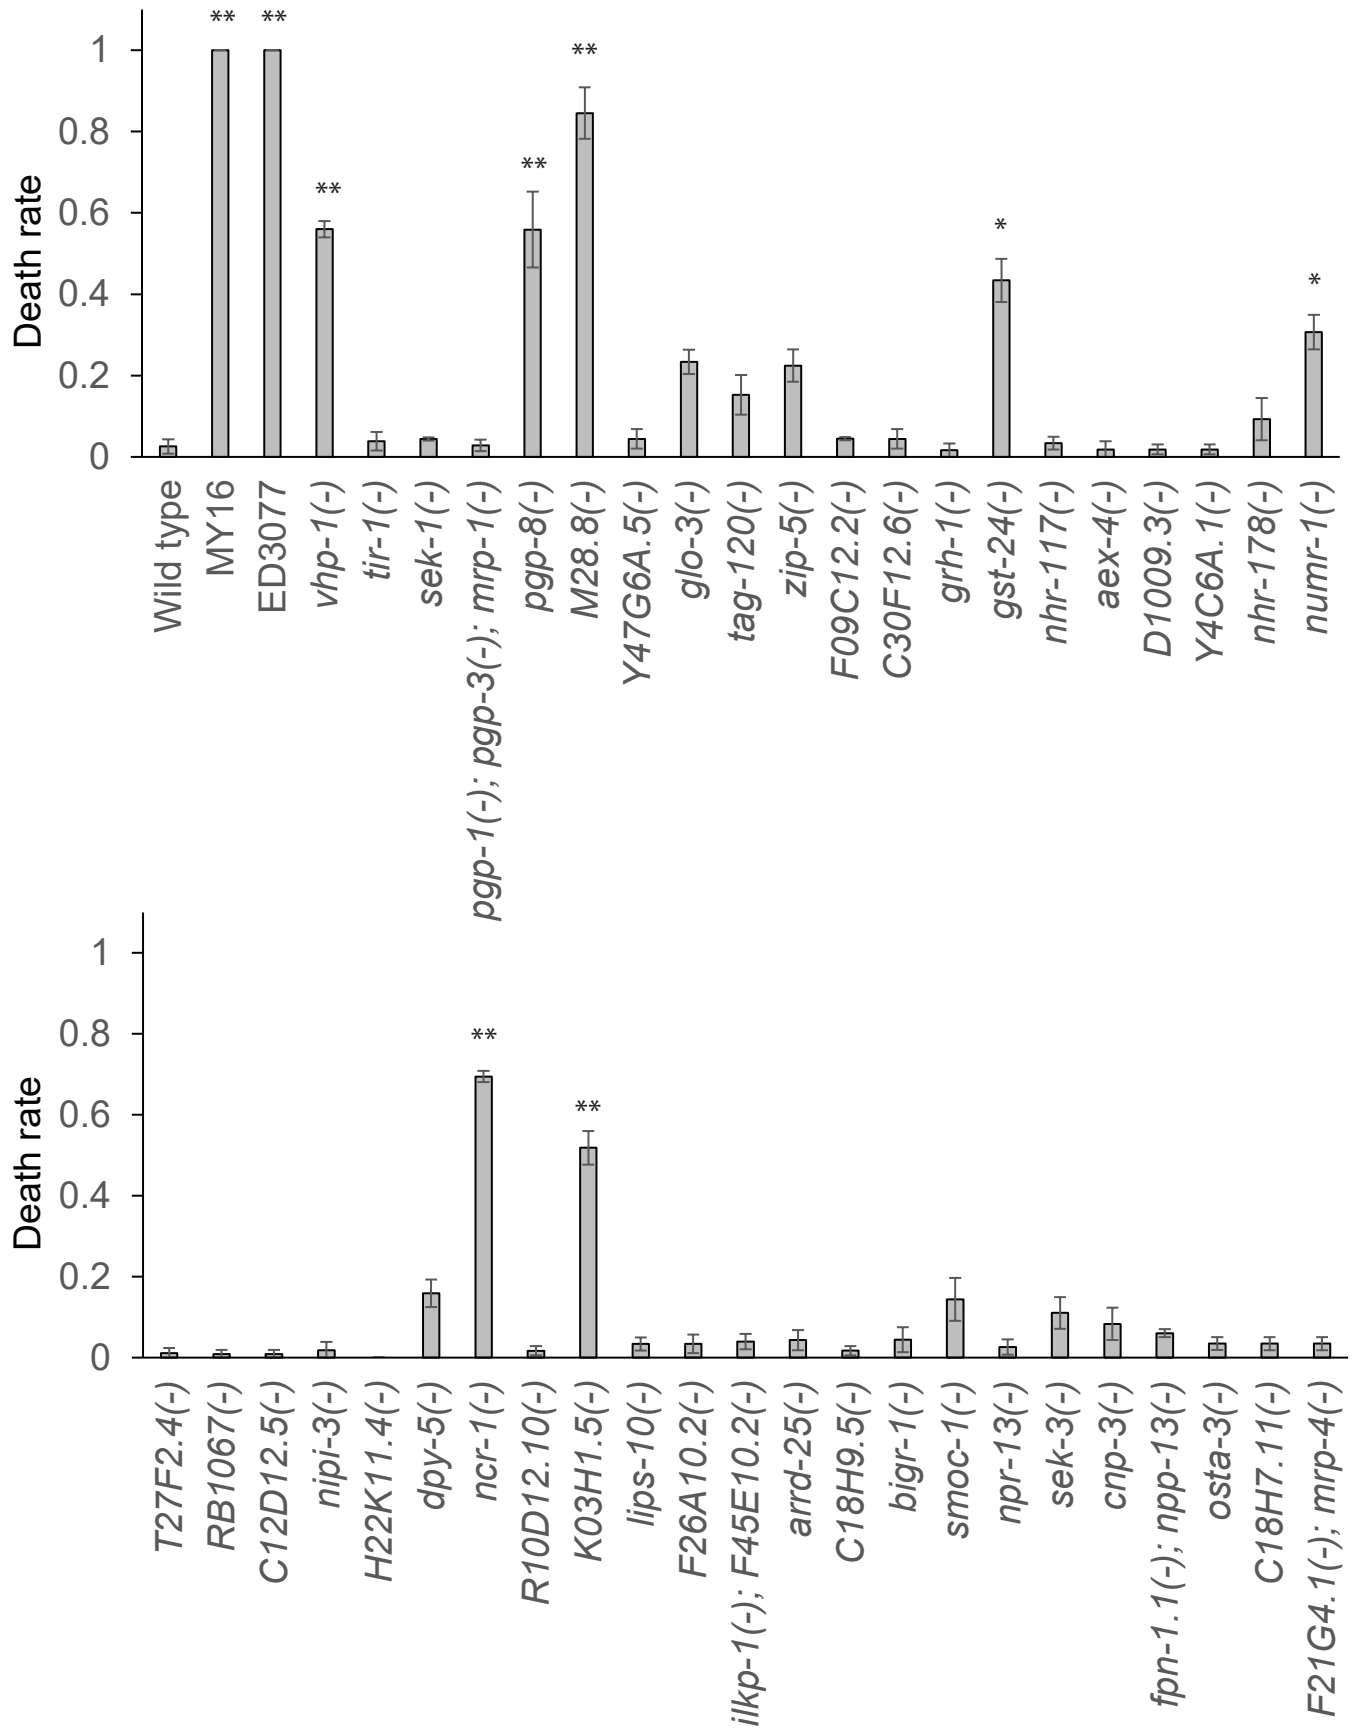

## Figure 7

7a

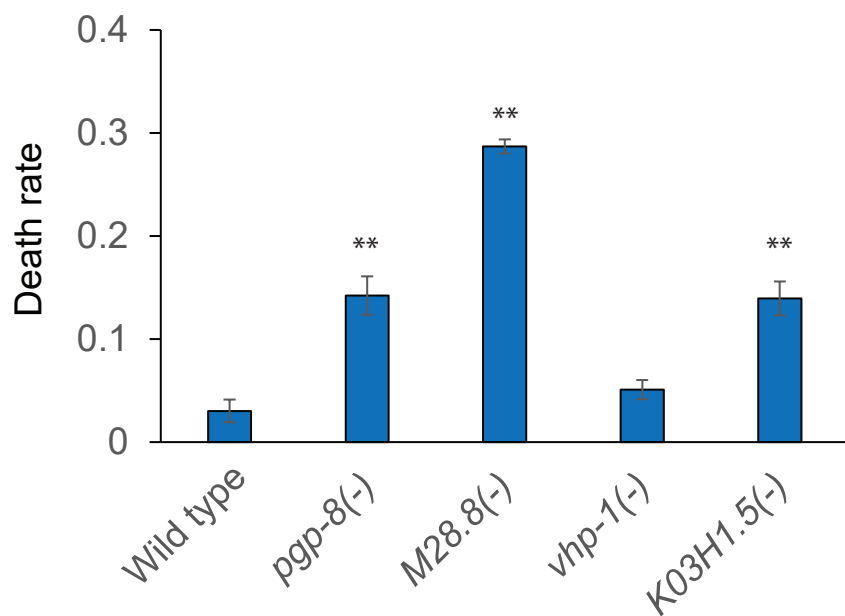

7b

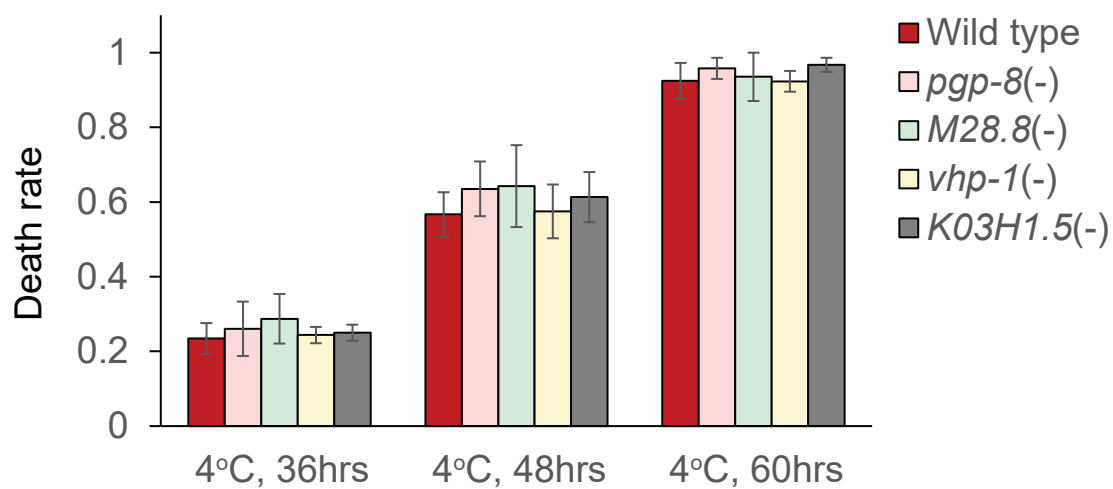

Source: http://biorxiv.org/content/10.1101/2021.05.10.443188v1.full.pdf
